# Supplementary figures and images for: Oleic acid and peanut oil high in oleic acid reverse the inhibitory effect of insulin production of the inflammatory cytokine TNF-α both in vitro and in vivo systems
Source: Springer Nature journal article supplement (doi:10.1186/1476-511x-8-25), 2009-01-01

Untreated

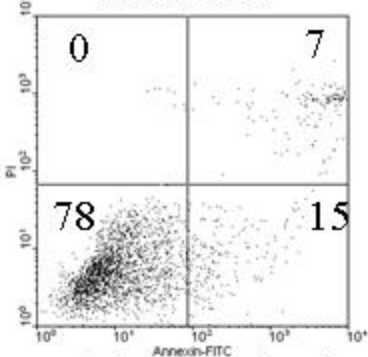

Oleic Acid (high)

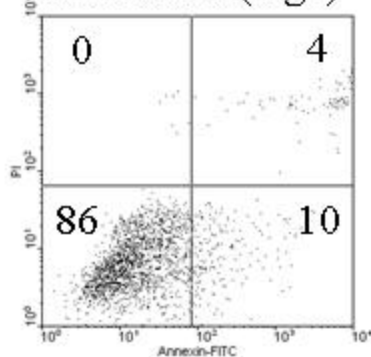

TNF- $\alpha$  (high)

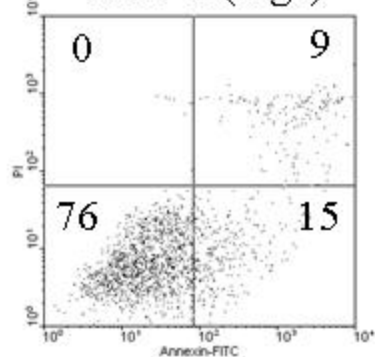

Oleic Acid (low)

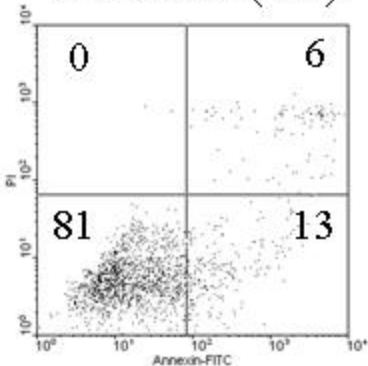

TNF- $\alpha$  (low)

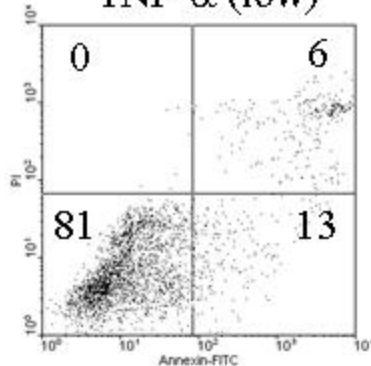

TNF- $\alpha$ +Oleic Acid

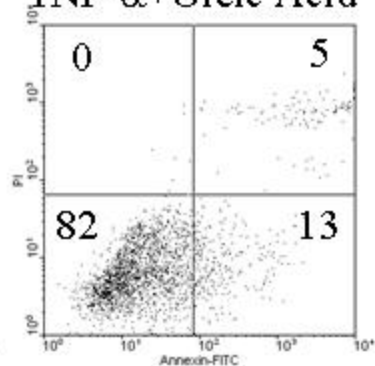

Supplement: 12944_2009_213_MOESM3_ESM.pdf [file 12944_2009_213_MOESM3_ESM.pdf]

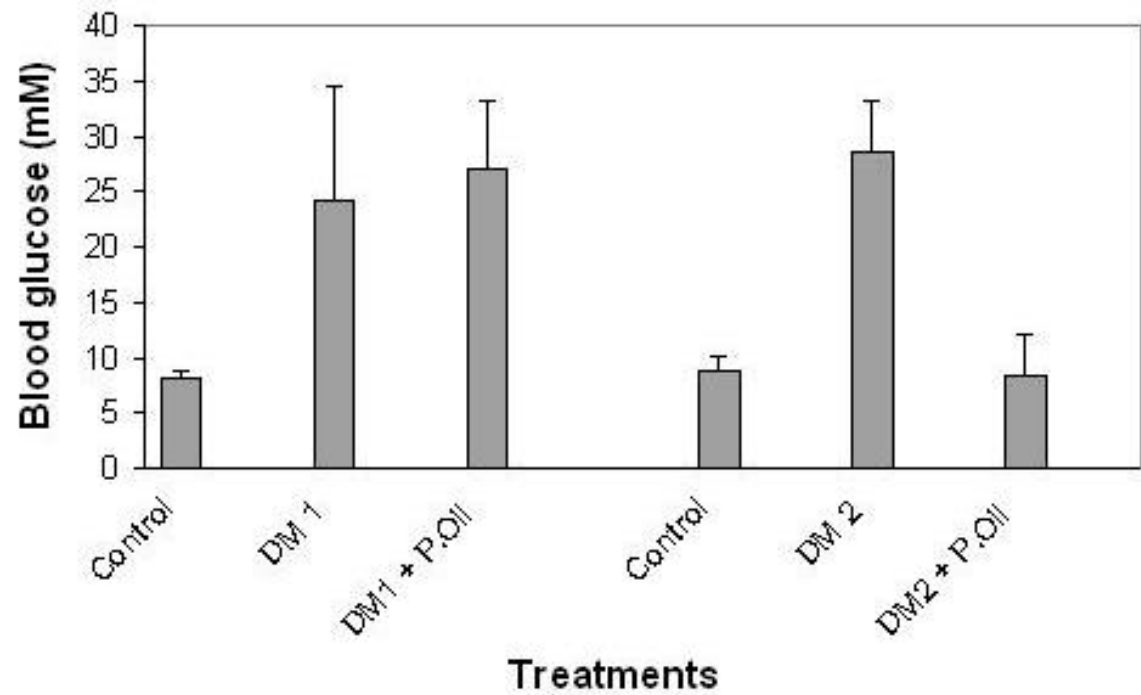

Supplement: 12944_2009_213_MOESM6_ESM.pdf [file 12944_2009_213_MOESM6_ESM.pdf]
